# Supplementary material for: Microbial Community Diversities and Taxa Abundances in Soils along a Seven-Year Gradient of Potato Monoculture Using High Throughput Pyrosequencing Approach
Source: PLOS journal article supplement (doi:10.1371/journal.pone.0086610), 2014-01-30
Supplement: S2 (10.1371/journal.pone.0086610.s002) [file journal.pone.0086610.s002]

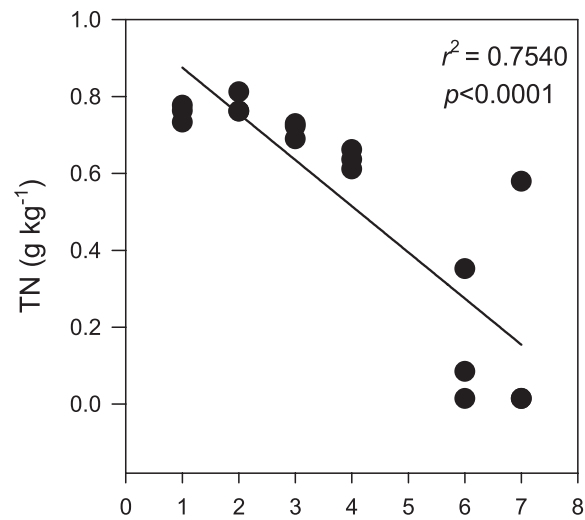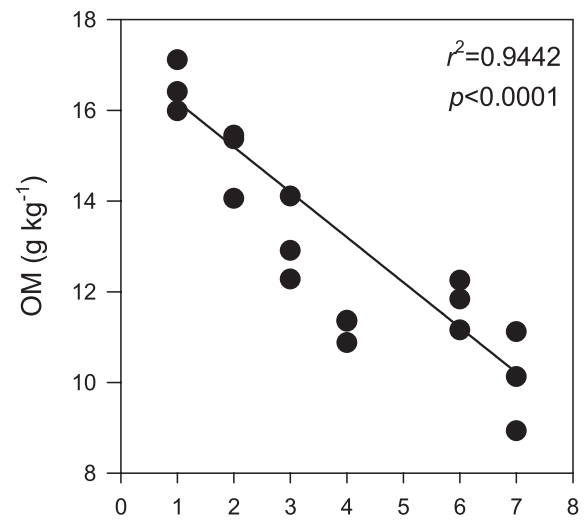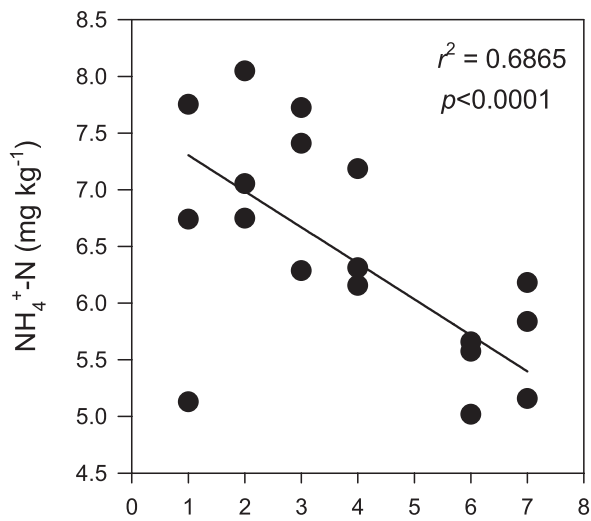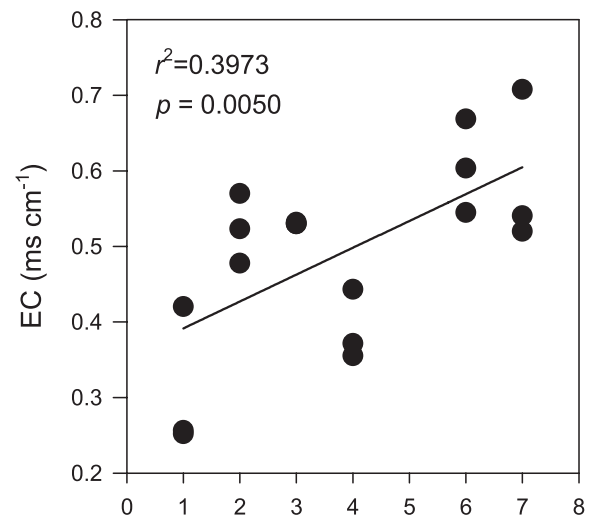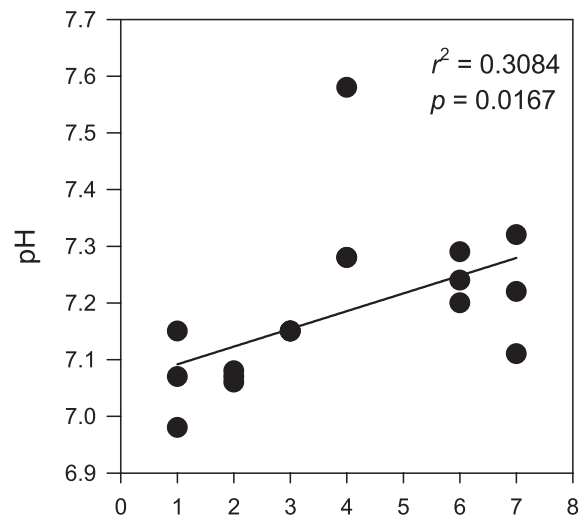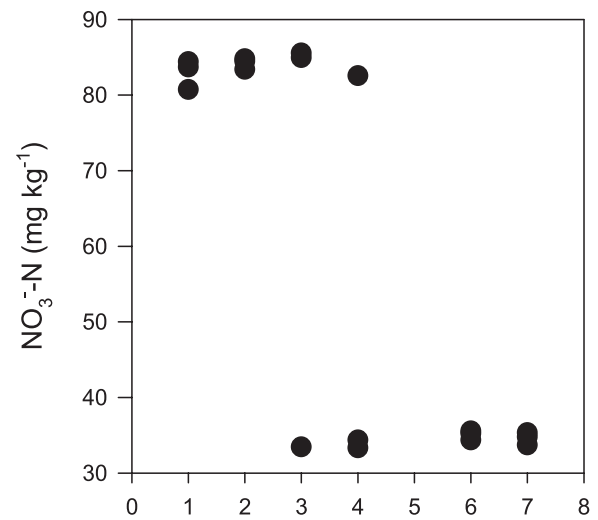

Year of monoculture

Year of monoculture
